# Supplementary material
Source: publisher site journal article supplement (https://www.dovepress.com/article/480621)
Supplement: Supplementary file 1 [file get_supplementary_file.php]

**Supplementary Material**


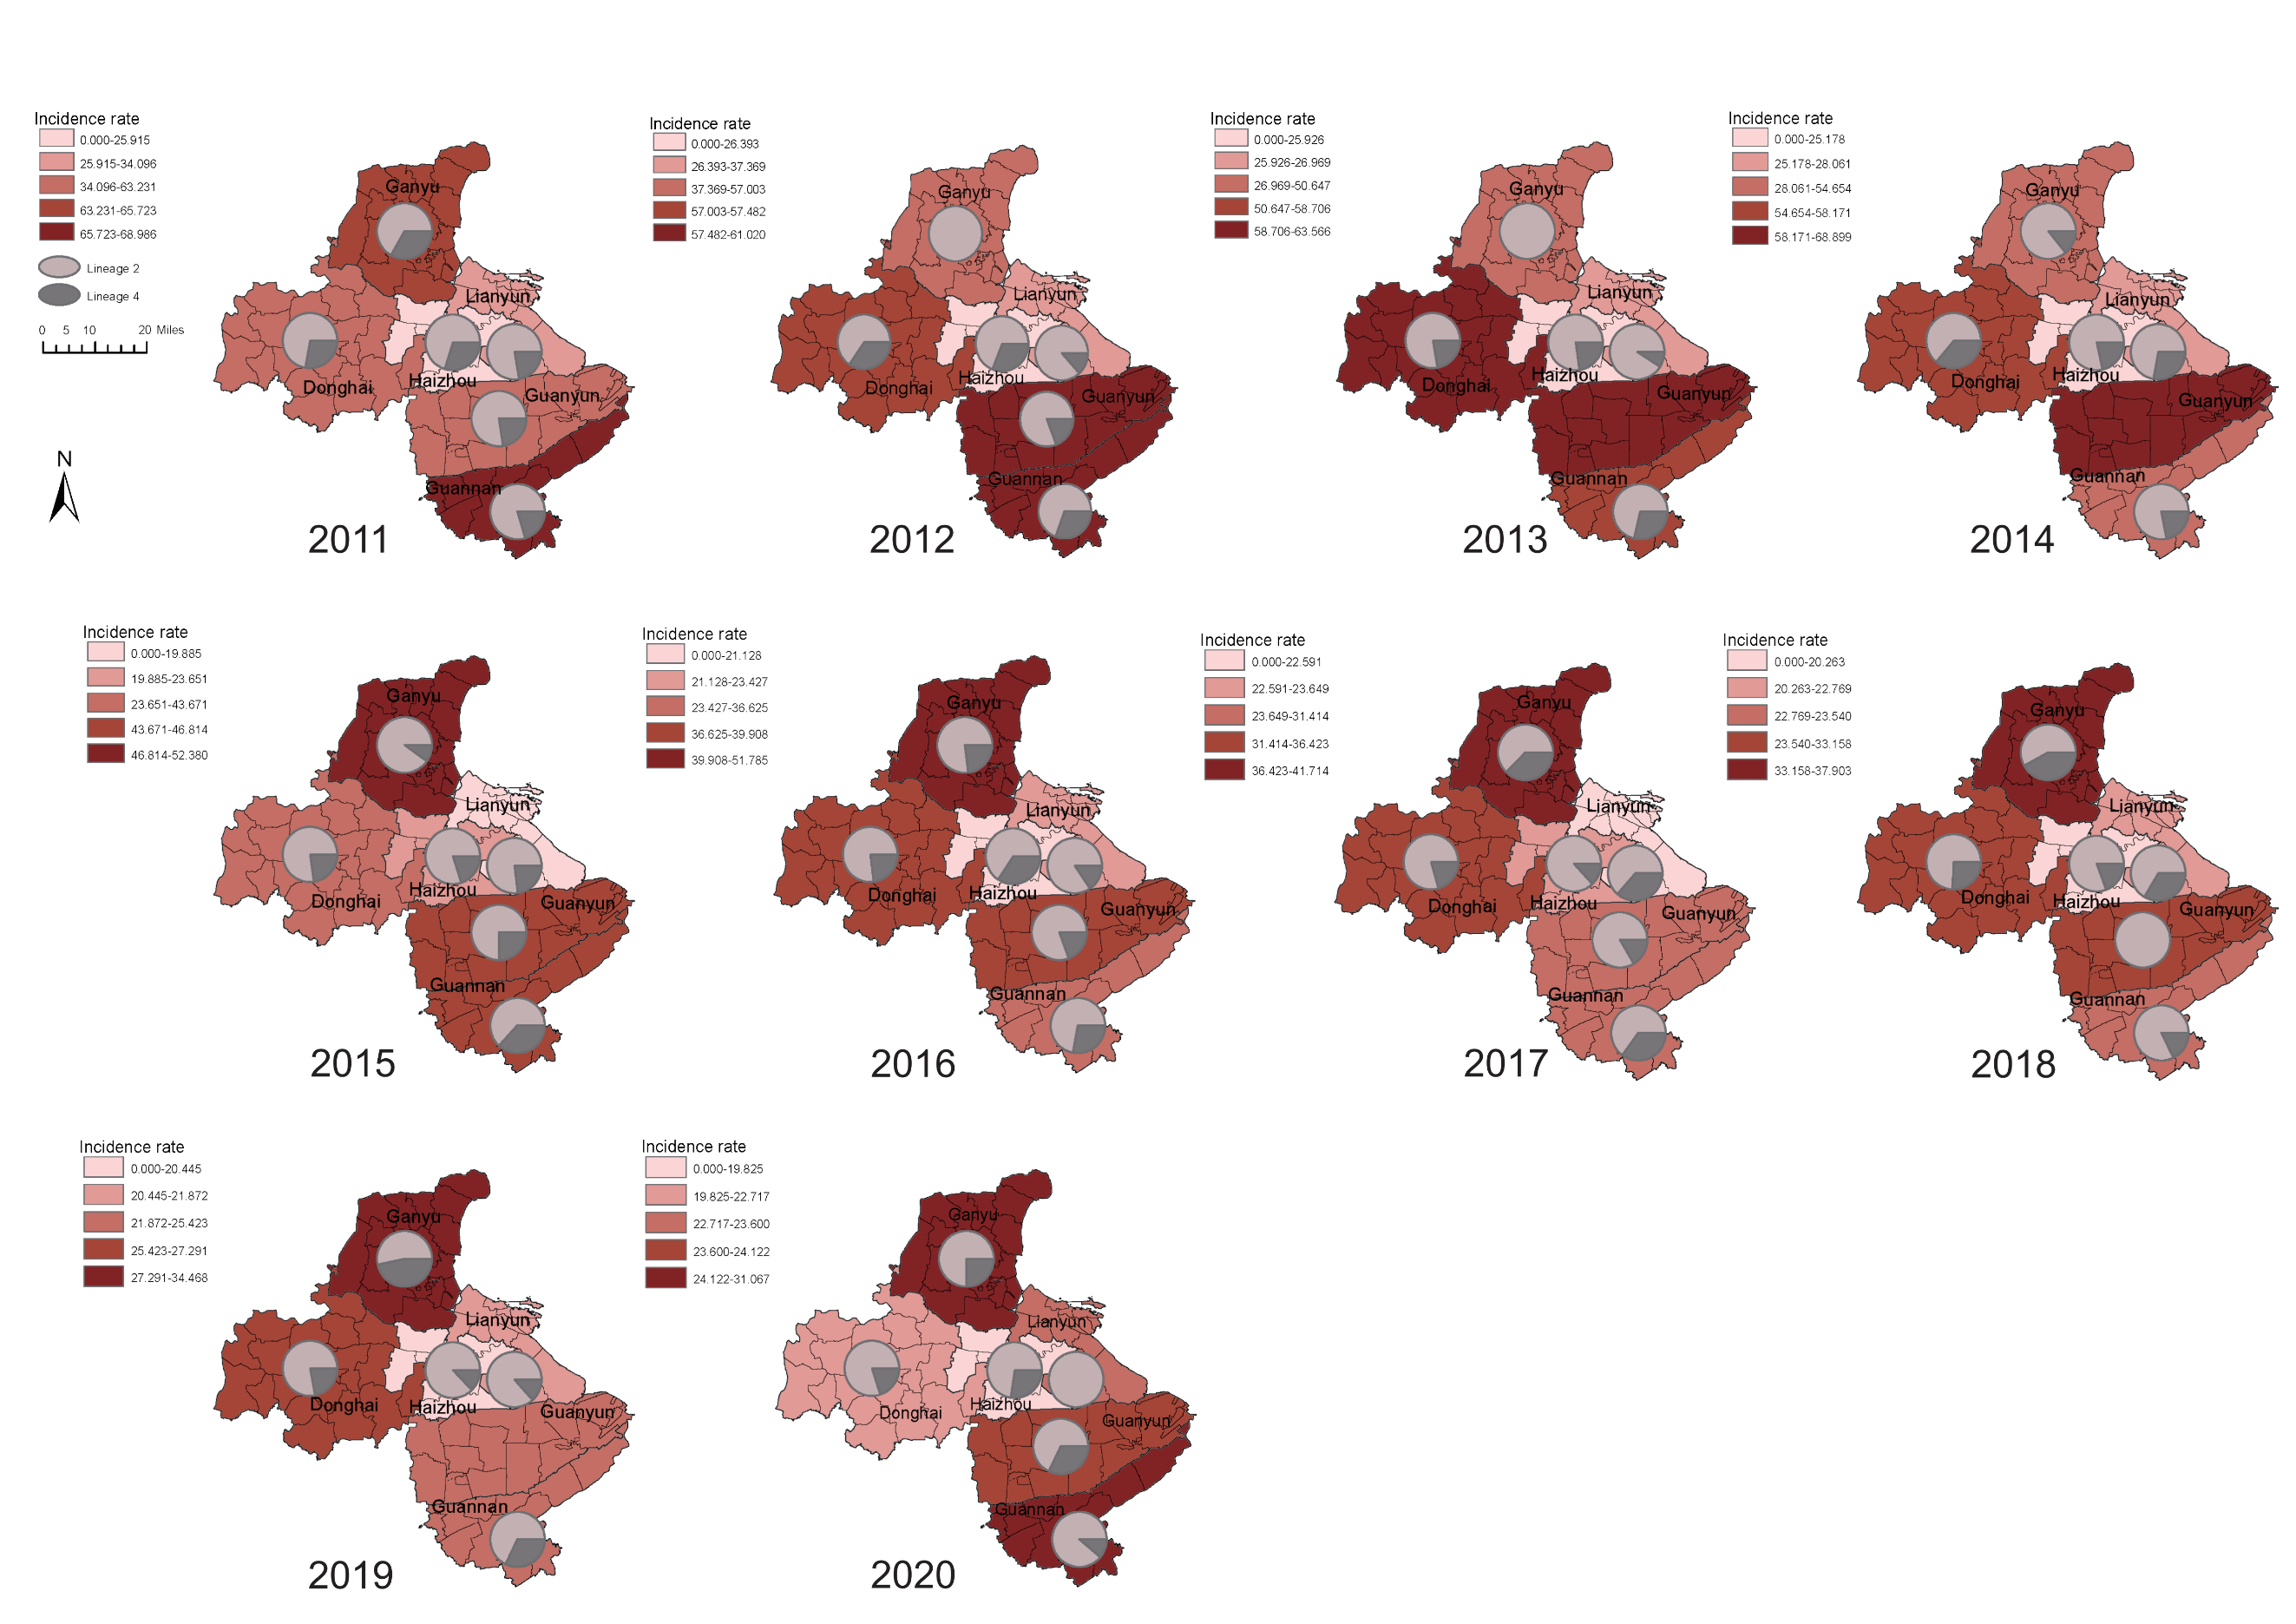


**Figure S1.** Theincidence rate of TB patients in each county per year in Lianyungang, China, 2011-2020. The pie charts represent the proportion of lineage 2 (light grey) and 4 (dark grey)
